# Supplementary material for: Local charge polarization by introducing a cyanamide group and sulfur dopant with accelerated exciton dissociation and promotion of charge separation for improving CO2 photoreduction performance
Source: Royal Society of Chemistry journal article supplement (doi:10.1039/d5ta02281a), 2025-01-01
Supplement: d5ta02281a1.pdf [file d5ta02281a1.pdf]

## Supporting Information

### **Local charge polarization by introducing cyanamide group and sulfur dopant with accelerated exciton dissociation and promoted charge separation for improving CO<sub>2</sub> photoreduction performance**

Yanrui Li,<sup>\*a</sup> Bozhan Li,<sup>a</sup> Xiang Gao,<sup>b</sup> Linda Wang,<sup>a</sup> Xuehao Li,<sup>a</sup> Ruyu Guo<sup>a</sup>

a. College of Materials Science and Engineering, Xi'an University of Science and Technology, Xi'an, 710054, China. E-mail: liyanrui91@xust.edu.cn

b. College of Geology and Environment, Xi'an University of Science and Technology, Xi'an 710054, China.

## Experimental Section

### Chemicals and Materials

Melamine (MA), Potassium thiocyanate (KSCN) and Thiocarbamide ( $\text{CH}_4\text{N}_2\text{S}$ ) were purchased from Sinopharm Chemical Reagent Co., Ltd (PR China), which were utilized without further purification.

### Synthesis of graphitic carbon nitride (GCN)

The GCN was synthesized by the thermal polycondensation method. For details, 20 g of melamine was put into a crucible with a lid and then put into a tube furnace, which was heat to 550 °C with a rate of 5 °C/min, and held under Ar atmosphere for 4 h. After cooling down to room temperature, the bulk was roundly ground into powder for further utilization.

### Characterization

X-ray diffraction (XRD) patterns of the samples were obtained over the diffraction angle ( $2\theta$ ) of 5-60° on a MiniFlex 600 (Rigaku, Japan) with Cu-K $\alpha$  radiation. Fourier transform infrared (FTIR) spectra were acquired on a Bruker Tensor II spectrometer with KBr pellet. Transmission electron microscopy (TEM) images and scanning electron-microscopy (SEM) with element mapping analyses were conducted on transmission electron microscope (Tecnai G2 F30) and transmission electron microscope (JSM-7800F, JEOL), respectively. X-ray photoelectron spectroscopy (XPS) examinations were carried out on a PHI-1600 Xray photoelectron spectrometer using Al K $\alpha$  radiation.  $^{13}\text{C}$  solid-state nuclear magnetic resonance (NMR) spectra were conducted on cross-polarization (CP) magic-angle spinning (MAS) sequence mode (JNM-ECZ400R/S1, JEOL). The UV-Vis DRS spectrum was measured Shimadzu PE lambda 750 equipped with an integrating sphere, with solid  $\text{BaSO}_4$  powder as the reference standard. Photoluminescence (PL) spectra were performed on a Shimadzu RF-6000 spectrometer with an excitation wavelength of 370 nm. Temperature-dependent PL spectra on a Fluoromax-4 spectrophotometer equipped with a cryo-77 cryogenic liquid nitrogen thermostat was utilized to measure the exciton binding energy ( $E_b$ ) by the equation (1)<sup>[1]</sup>:

$$I(T) = I_0 / (1 + A \exp(-E_b/k_B T)) \quad (1)$$

$I(T)$  was the normalized PL intensity at given temperature  $T$ ,  $I_0$  was the PL intensity at 0K,  $k_B$  was the Boltzmann constant and  $A$  was the constant related to the density of the nonradiative recombination centers.

### Electrochemical characterization.

Electrochemical workstation (CHI760E, ChenHua, China) equipped with the standard three-electrode system was utilized to carry out the electrochemical measurements, in which Pt as the counter electrode, Ag/AgCl electrode as the reference electrode catalyst-coated FTO conductive glass as the working electrode. Additionally, the as-prepared catalysts (5 mg) dissolved in the mixed solution of 20  $\mu$ L Nafion solution, 400  $\mu$ L ethanol and 100  $\mu$ L deionized water were dispersed on FTO conductive glass, which was then dried overnight to obtain working electrode. 0.2 M NaSO<sub>4</sub> solution was employed as electrolyte. Mott-Schottky (M-S) plots of as-prepared photocatalysts were recorded at 500, 1000 and 1500 Hz under dark condition. The photocurrent measurement was recorded with a 300 W xenon lamp (PLS-SXE300D). Electrochemical impedance spectroscopy (EIS) plots were carried out with the frequency sweep range of 100-10<sup>6</sup> Hz and the amplitude 5 mV.

### Computational Methods

Density functional theory (DFT) calculations were performed through the Cambridge Sequential Total Energy Package (CASTEP) code using the generalized gradient approximation (GGA) and Perdew-Burke-Ernzerhof (PBE) functional<sup>[2]</sup>. The accurate density of electronic state was calculated by using the plane wave cutoff energy of 435 eV and the  $k$ -point sets of  $1 \times 2 \times 1$ . In addition, the energy tolerance and force tolerance were considered as  $2 \times 10^{-5}$  eV·atom<sup>-1</sup> and 0.05 eV·Å<sup>-1</sup>, respectively. In order to avoid interactions between the periodic images, a vacuum layer of 10 Å was utilized. The adsorption energy ( $E_a$ ) of the adsorbates in CO<sub>2</sub> reduction could be calculated by equation 2 as following equation (2)<sup>[3]</sup>:

$$E_a = E_R^* - (E_R + E^*) \quad (2)$$

Where  $E_R^*$  was the total energy of an adsorbate (R) adsorbed on the surface (\*) and  $E_R$  and  $E^*$  are the energies of the single adsorbate and clean surface, respectively.

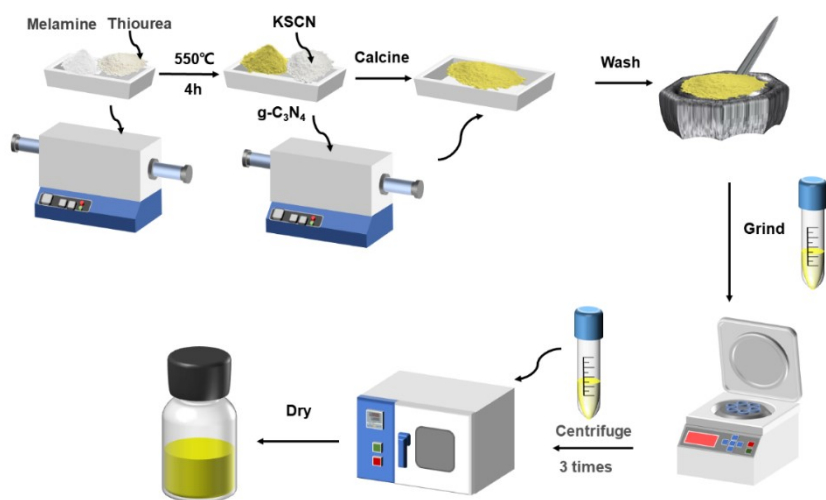

**Scheme S1.** Schemed fabrication process for SCN-x.

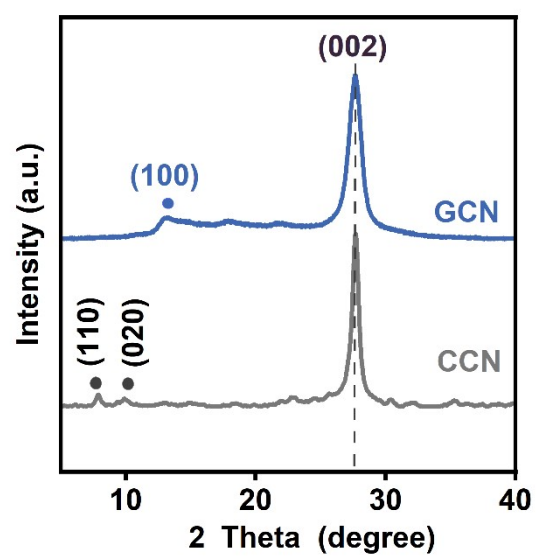

**Figure S1.** XRD patterns of GCN and CCN.

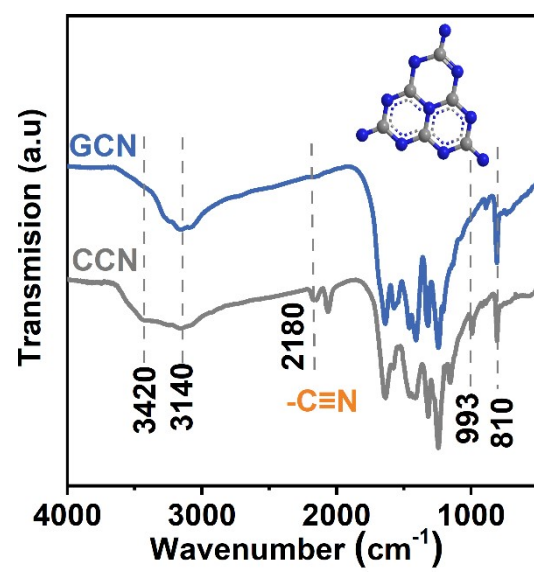

**Figure S2.** FT-IR spectrum of GCN and CCN.

As illustrated in Figure S3, there was no obvious change on the morphology of SCN-0.5 after introducing S dopant in contract to CCN.

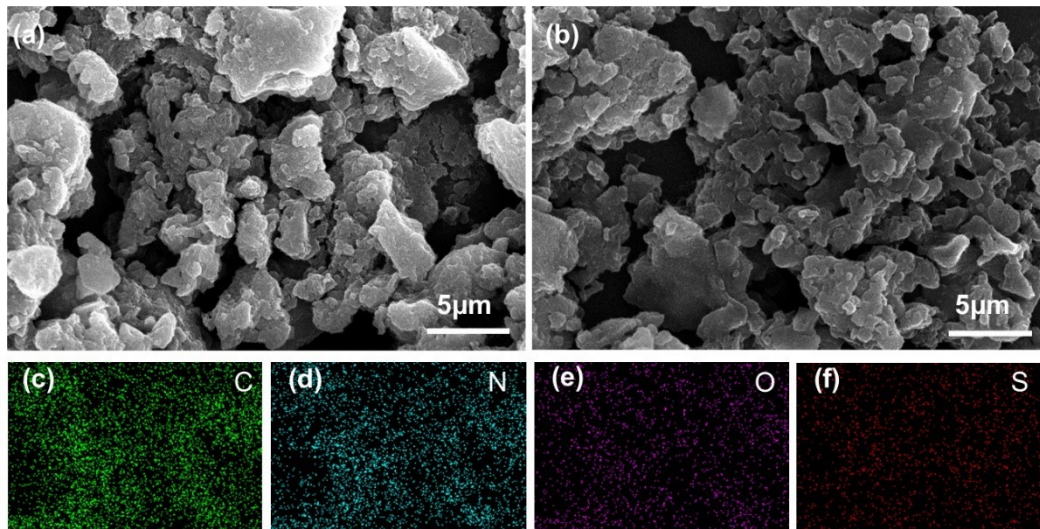

**Figure S3.** SEM pattern of sample a) CCN, b) SCN-0.5 and SEM-mapping images of c) C, d) N, e) O and f) S of SCN-0.5.

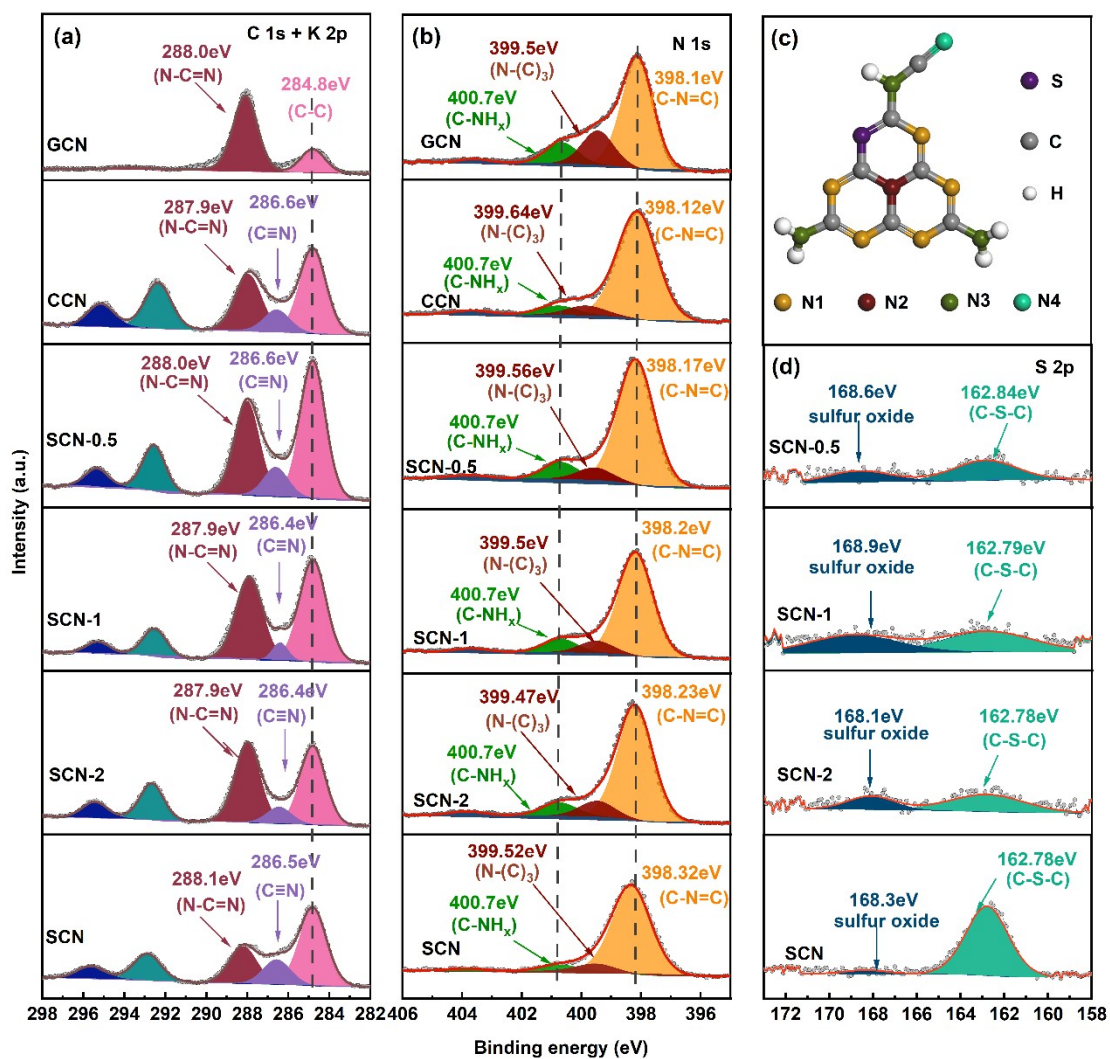

**Figure S4.** XPS spectra of a) C 1s and K 2p, b) N 1s and d) S 2p for GCN, CCN, and SCN-x. c) Schematic illustration for -CN groups and S dopant in heptazine conjugate ring.



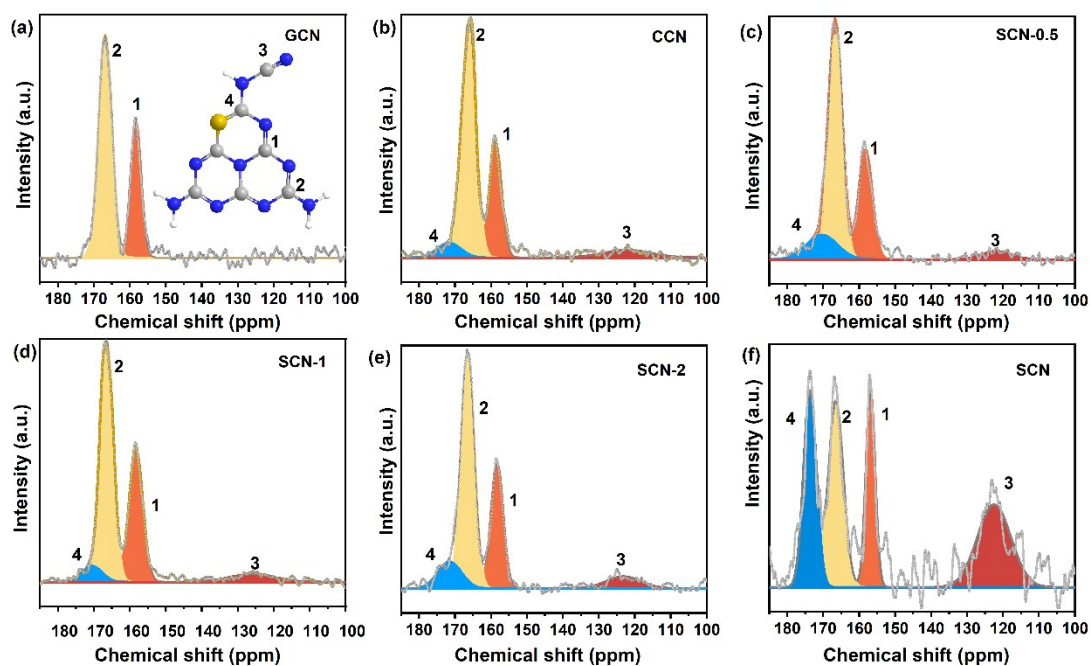

**Figure S5.** Solid-state  $^{13}\text{C}$  NMR spectra for a) GCN, b) CCN, c) SCN-0.5, d) SCN-1, e) SCN-2 and f) SCN.

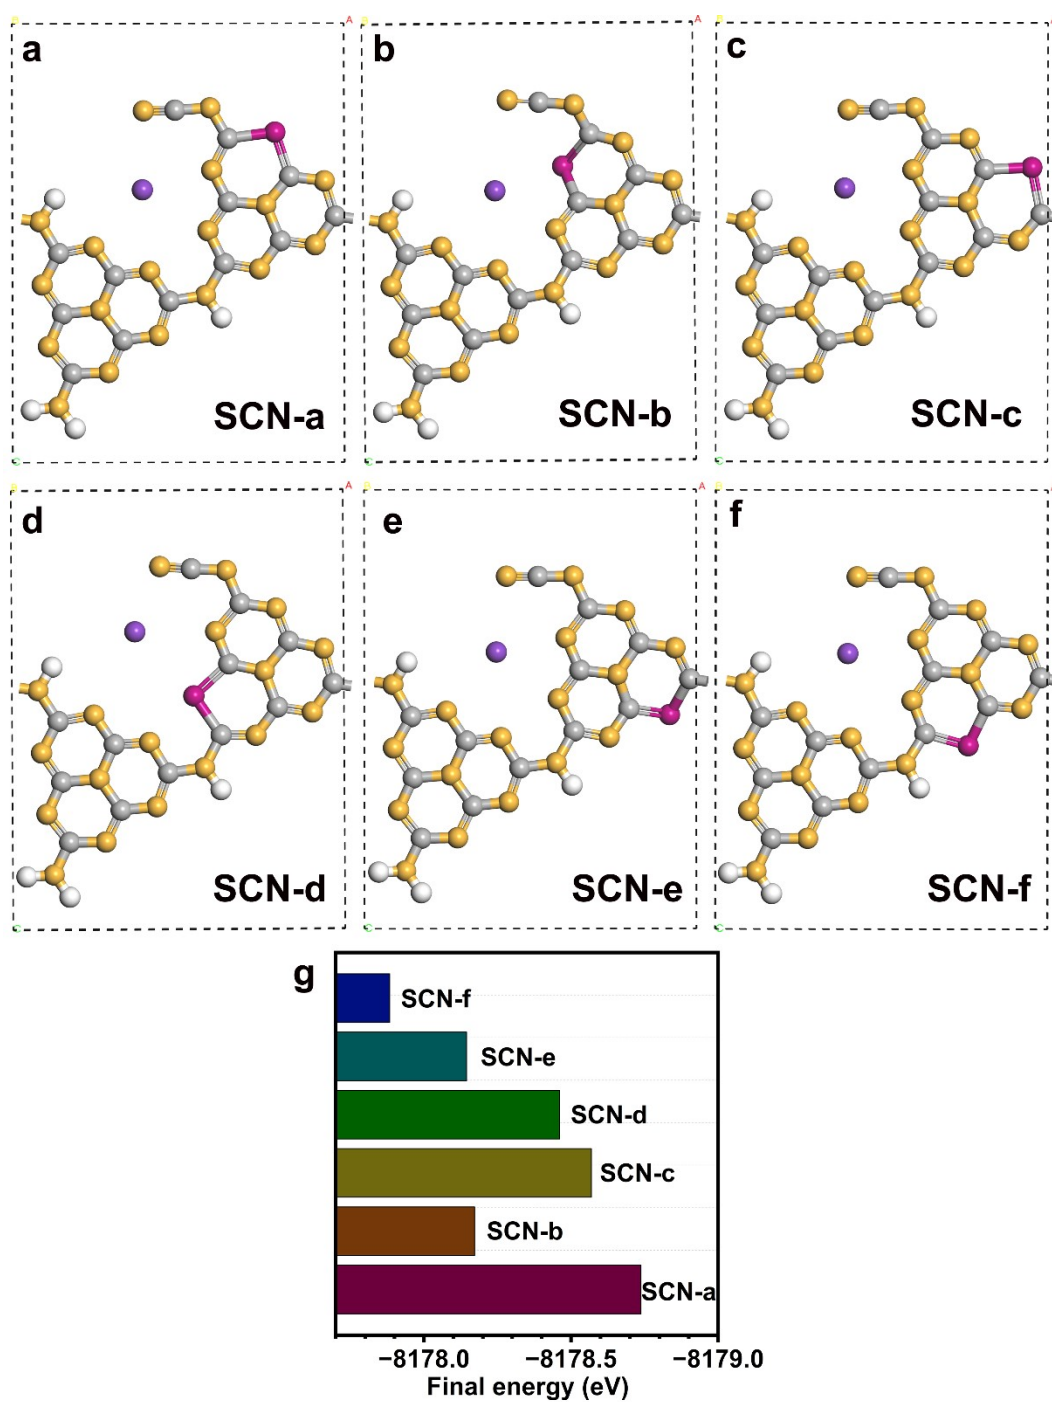

**Figure S6.** a-f) Six models of N1 replaced by S dopant. g) The formation energy of S dopant replacement models.

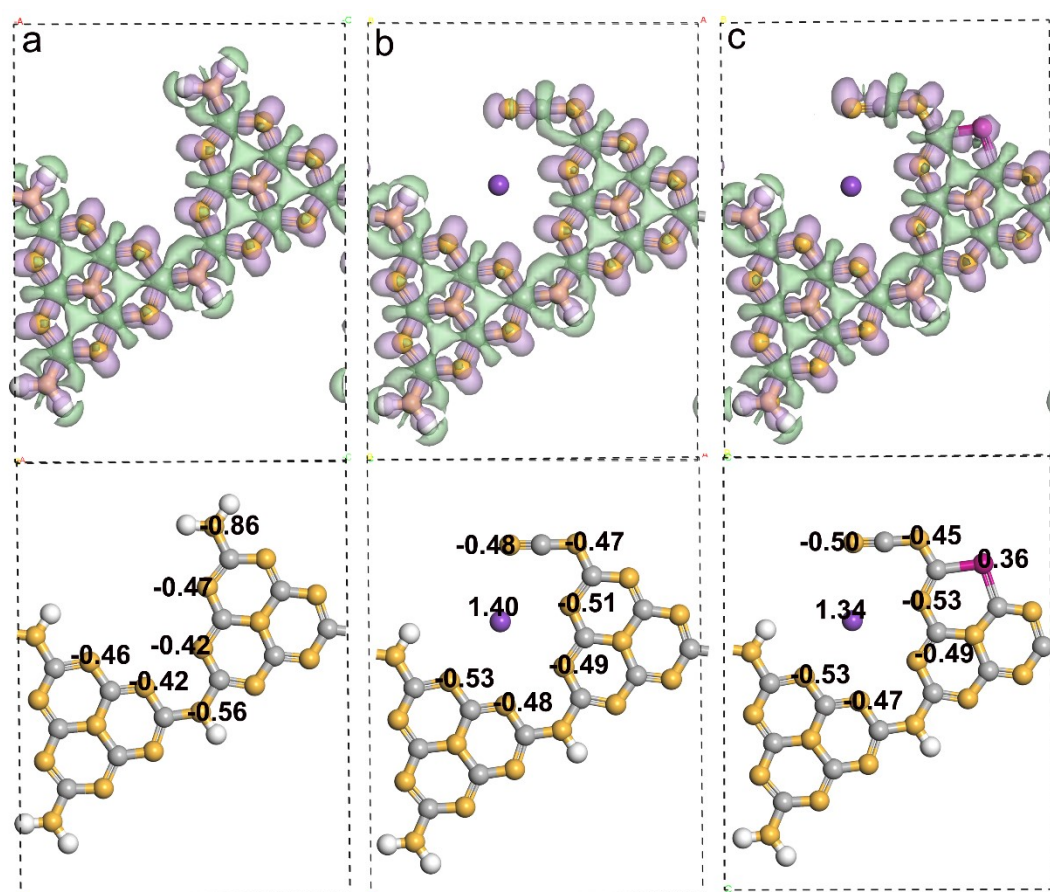

**Figure S7.** Charge density difference and corresponding bard charge for a) GCN, b) CCN and c) SCN.

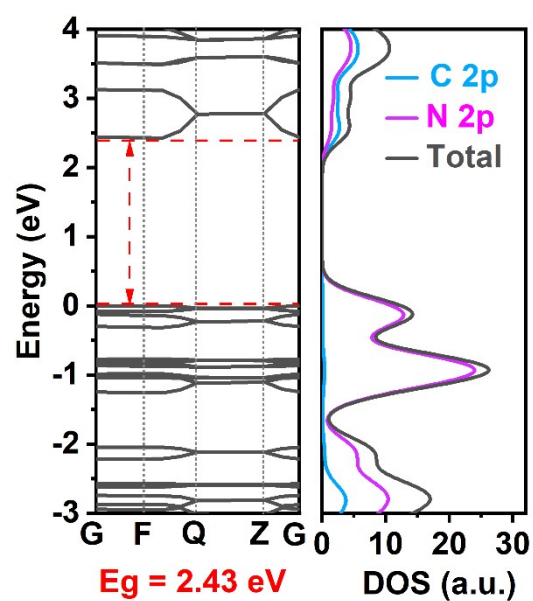

**Figure S8.** DFT calculated band structure (left) and corresponding density of states (right) for GCN.

The flat-band potentials of GCN, CCN and SCN-x were detected from Mott-Schottky (M-S) plots to be -0.91 V, -0.63 V, -0.88 V, -0.98 V, -1.09V, and -0.93 V (vs. Ag/AgCl), which were equivalent to -0.71 V, -0.43 V, -0.68 V, -0.78 V, -0.89 V, and -0.73 V versus the normal hydrogen electrode (vs. NHE), respectively, according to equation of  $E_{\text{NHE}} = E_{\text{Ag/AgCl}} + 0.197 \text{ V}$  [4]. Generally, the conduction band (CB) minimum is  $\sim 0.2 \text{ V}$  more negative than the flat-band potential[5]. Therefore, the CB of PCN, CCN, and CCN aerogels could be calculated to be -0.91 V, -0.63 V, -0.88 V, -0.98 V, -1.09 V, and -0.93 V (vs. NHE), respectively.

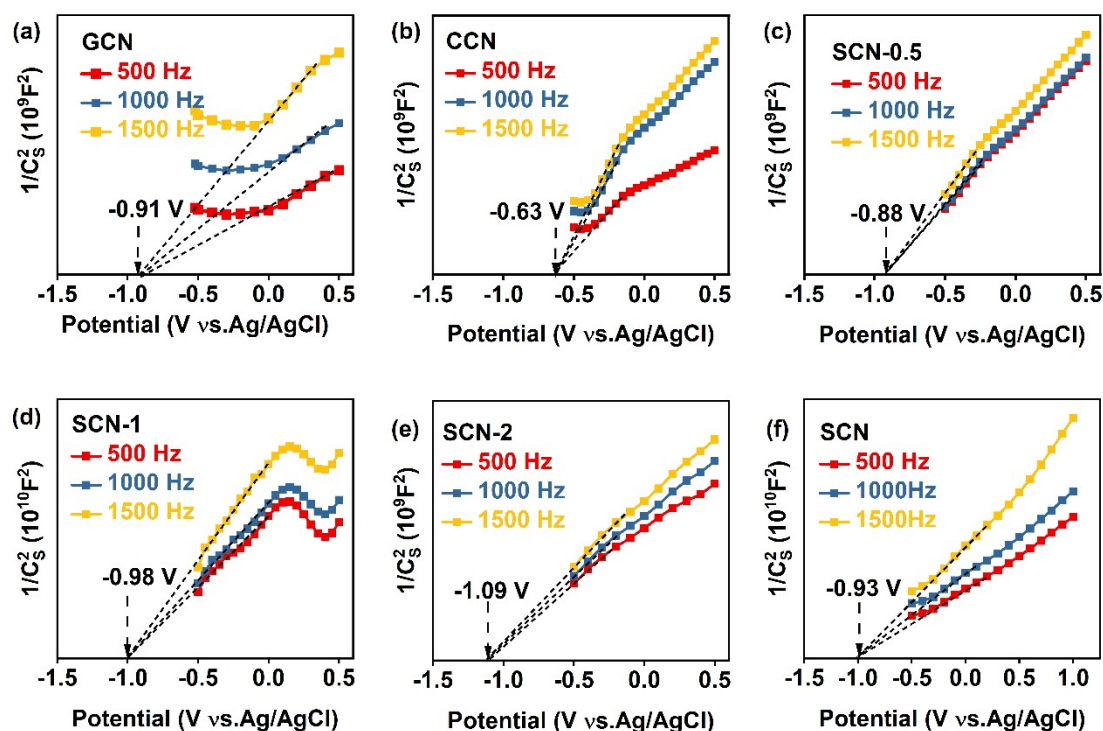

**Figure S9.** Mott-Schottky (M-S) plots of a) GCN, b) CCN, c) SCN-0.5, d) SCN-1, e) SCN-2, f) SCN.

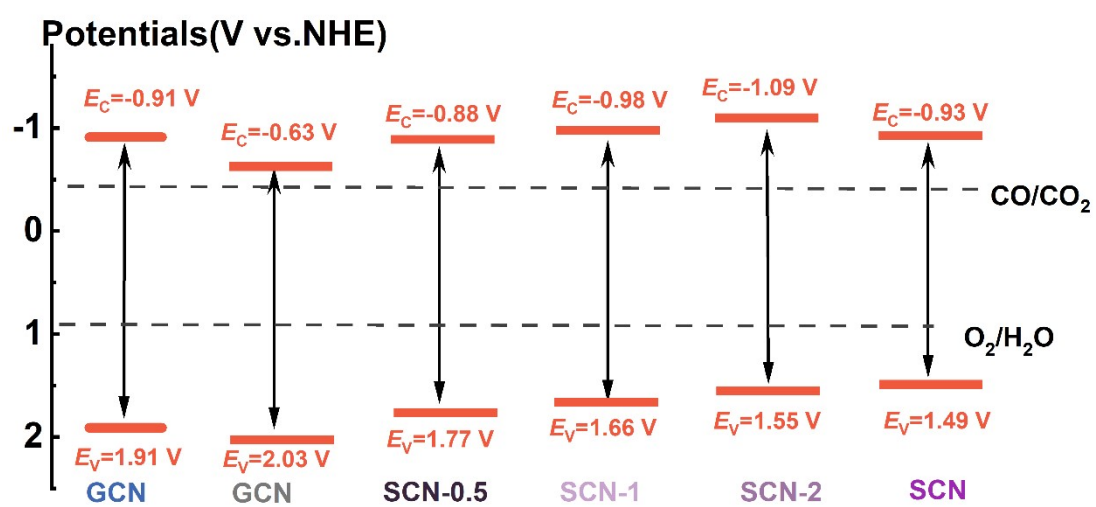

Figure S10. Band structure diagrams of GCN, CCN and SCN-x.

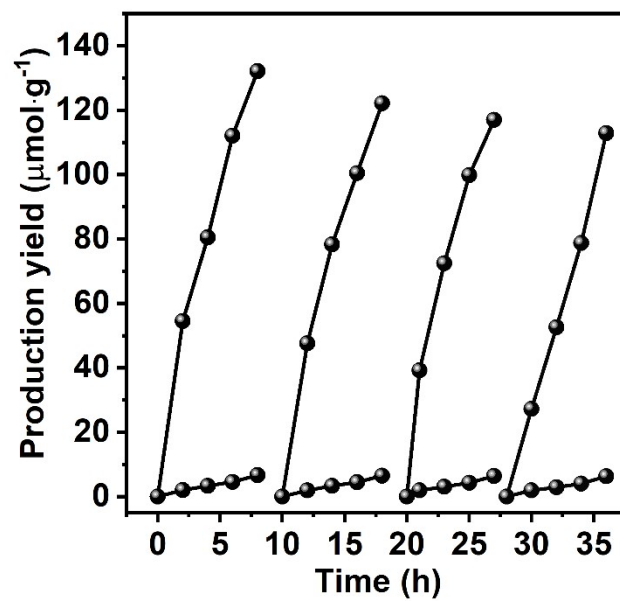

**Figure S11.** Recycle photocatalytic CO<sub>2</sub> reduction over SCN-x.

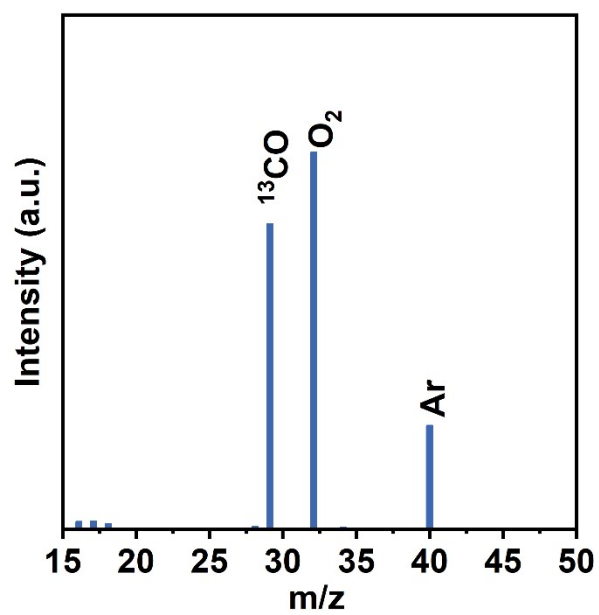

**Figure S12.** Isotopic measurement of photocatalytic  $\text{CO}_2$  reduction using  $^{13}\text{CO}_2$  as the carbon source.



As illustrated in Figure S13, the CO<sub>2</sub> adsorption curve for GCN exhibited slight rise than CCN in the high-pressure range, which was due to the electrons-accumulated -CN groups favorable for CO<sub>2</sub> adsorption. After introducing S dopant, the curves of SCN-x displayed significant increase than GCN and CCN in both high and low pressure range, attributed to the further enhanced electron density of -CN groups via the charge distribution induced by S dopant. Above phenomenon was consistent with the calculation results of charge density difference of CO<sub>2</sub> adsorption (Figure 5b) and strongly confirmed that SCN-x obtained a stronger ability of CO<sub>2</sub> adsorption than GCN and CCN.

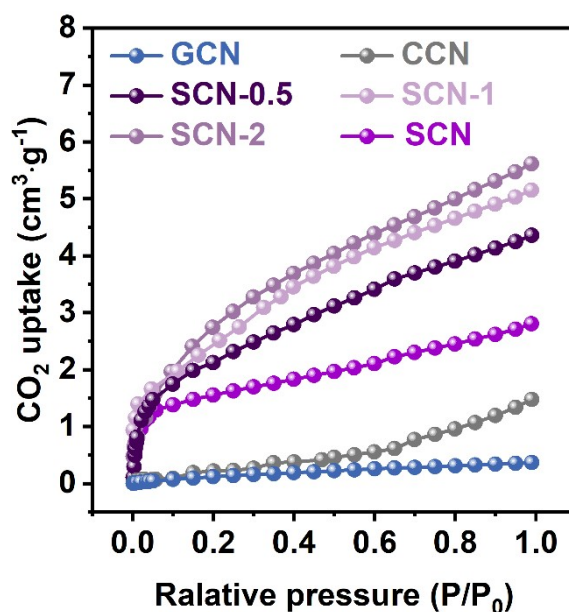

**Figure S13.** CO<sub>2</sub> gas absorption isotherms of GCN, CCN and SCN-x.

**Table S1.** The full width at half maxima (FWHM) values and  $d$ -spacing of the (002) diffraction peak of GCN, CCN and SCN-x estimated by XRD results.

| XRD      | GCN    | CCN    | SCN-0.5 | SCN-1  | SCN-2  | SCN    |
|----------|--------|--------|---------|--------|--------|--------|
| FWHM (°) | 1.42   | 0.820  | 1.09    | 1.13   | 1.15   | 1.25   |
| $d$ (nm) | 0.3225 | 0.3214 | 0.3211  | 0.3167 | 0.3164 | 0.3148 |

**Table S2.** The surface atomic percentages of C, N and S elements measured by XPS over GCN, CCN, SCN-0.5, SCN-1, and SCN. C1, C2 and C3 are related to graphitic carbon, sp<sup>2</sup>-bonded carbon in the aromatic ring (N=C-N) and sp<sup>3</sup>-bonded carbon in -C≡N groups, respectively, as displayed in Figure S4.

| samples | C(at%) <sup>a</sup> |         |         | N(at%) | O(at%) | K(at%) | S(at%) | C/N  | C/S    |
|---------|---------------------|---------|---------|--------|--------|--------|--------|------|--------|
| GCN     | 59.44               |         |         | 39.14  | 1.43   | /      | /      | 1.09 | /      |
|         | C1(at%)             | C2(at%) | C3(at%) |        |        |        |        |      |        |
|         | 24.09               | /       | 75.91   |        |        |        |        |      |        |
| CCN     | 55.21               |         |         | 22.15  | 6.61   | 16.03  | /      | 1.18 | /      |
|         | C1(at%)             | C2(at%) | C3(at%) |        |        |        |        |      |        |
|         | 52.52               | 12.68   | 34.8    |        |        |        |        |      |        |
| SCN-0.5 | 54.19               |         |         | 21.9   | 7.62   | 16.13  | 0.15   | 1.17 | 171.37 |
|         | C1(at%)             | C2(at%) | C3(at%) |        |        |        |        |      |        |
|         | 52.57               | 11.39   | 36.04   |        |        |        |        |      |        |
| SCN-1   | 55.67               |         |         | 22.67  | 7.08   | 14.02  | 0.56   | 1.22 | 49.33  |
|         | C1(at%)             | C2(at%) | C3(at%) |        |        |        |        |      |        |
|         | 50.38               | 9.93    | 39.69   |        |        |        |        |      |        |
| SCN-2   | 55.20               |         |         | 25.11  | 4.92   | 13.9   | 0.83   | 1.21 | 36.49  |
|         | C1(at%)             | C2(at%) | C3(at%) |        |        |        |        |      |        |
|         | 45.14               | 9.54    | 45.32   |        |        |        |        |      |        |
| SCN     | 57.14               |         |         | 18.16  | 8.71   | 14.39  | 1.6    | 1.41 | 16.03  |
|         | C1(at%)             | C2(at%) | C3(at%) |        |        |        |        |      |        |
|         | 55.13               | 18.04   | 26.83   |        |        |        |        |      |        |

a, at% is the atomic percentage;

b, C:N atomic ratio is calculated by  $C:N = (C \times (C2 + C3)) : N$ ; C:S atomic ratio is calculated by  $C:S = (C \times (C2 + C3)) : S$ , which could exclude the inevitable graphitic carbon (C1) originated from surrounding or contaminants.

**Table S3.** Photocatalytic CO<sub>2</sub> reduction performances of previously reported GCN-based photocatalysts without transition-metal and noble-metal modification.

| Photocatalyst        | Light source                                                          | Condition                      | CO reaction rate<br>( $\mu\text{mol}\cdot\text{g}^{-1}\cdot\text{h}^{-1}$ ) | CO selectivity | Ref.             |
|----------------------|-----------------------------------------------------------------------|--------------------------------|-----------------------------------------------------------------------------|----------------|------------------|
| <b>SCN-0.5</b>       | <b>300 W Xenon lamp,<br/><math>\lambda &gt; 420 \text{ nm}</math></b> | <b>gas-solid,<br/>water</b>    | <b>16.5</b>                                                                 | <b>95%</b>     | <b>This work</b> |
| KP/CN-2              | 300 W Xenon lamp,<br>$\lambda > 420 \text{ nm}$                       | gas-solid,<br>water            | 11.7                                                                        | 66.86%         | [6]              |
| K/S@CN-0.5           | 10 W Vlight lamp                                                      | gas-liquid-solid, KOH solution | 16.3                                                                        | 78.07%         | [7]              |
| Vc-OCN <sub>15</sub> | 300W Xenon lamp,<br>$\lambda > 400 \text{ nm}$                        | gas-solid,<br>water            | 13.7                                                                        | $\sim 100\%$   | [8]              |
| BCN-1                | 420 nm–780 nm                                                         | gas-liquid-solid, water        | 13.9                                                                        | 92.3%          | [9]              |
| 0.1K-AUCN            | 1 sun simulated sunlight,<br>Xenon lamp                               | gas-solid,<br>water            | 10.0                                                                        | 52.6%          | [10]             |
| Rh2/HCNS-Nv          | 300 W Xenon lamp                                                      | gas-solid,<br>water            | 5.2                                                                         | 26.7%          | [11]             |
| E-CN                 | 300 W Xenon lamp,<br>$\lambda > 420 \text{ nm}$                       | gas-solid,<br>water            | 47.08                                                                       | 81%            | [12]             |
| CNSK+5%              | 300 W Xenon lamp                                                      | gas-solid,<br>water            | 5.05                                                                        | 90.9%          | [13]             |
| Nv-rich-CN           | 300 W xenon lamp                                                      | gas-liquid-solid, water        | 6.6                                                                         | 97%            | [14]             |
| 15%RGO/H-CN          | 300 W Xenon lamp,<br>400-800 nm                                       | gas-solid,<br>water            | 1.79                                                                        | 63.3%          | [15]             |

## References:

- [1] a) G. Zhang, Y. Xu, D. Yan, C. He, Y. Li, X. Ren, P. Zhang, H. Mi, *ACS Catal.* **2021**, *11*, 6995-7005; b) Z. A. Lan, G. Zhang, X. Chen, Y. Zhang, K. A. I. Zhang, X. Wang, *Angew. Chem. Int. Ed.* **2019**, *58*, 10236-10240.
- [2] L. M. Azofra, D. R. MacFarlane, C. Sun, *Phys. Chem. Chem. Phys.* **2016**, *18*, 18507-18514.
- [3] G. Li, J. Han, H. Wang, X. Zhu, Q. Ge, *ACS Catal.* **2015**, *5*, 2009-2016.
- [4] L. Jiang, K. Wang, X. Wu, G. Zhang, S. Yin, *ACS Appl. Mater. Interfaces* **2019**, *11*, 26898-26908.
- [5] S. Yu, J. Li, Y. Zhang, M. Li, F. Dong, T. Zhang, H. Huang, *Nano Energy* **2018**, *50*, 383-392.
- [6] M. Chen, M. Guo, M. Zhai, J. Xu, L. Wang, *J. of CO Util.* **2023**, *68*, 102392.
- [7] J. M. Z. Liu, M. Hong, R. Sun, *ACS Catal.* **2023**, *13*, 2106-2117.
- [8] J. Li, C. He, J. Wang, X. Gu, Z. Zhang, H. Li, M. Li, L. Wang, S. Wu, J. Zhang, *Green Chem.* **2023**, *25*, 8826-8837.
- [9] X. Zeng, H. Chen, X. He, H. Zhang, W. Fang, X. Du, W. Li, Z. Huang, L. Zhao, *Environ. Res.* **2022**, *207*, 112178.
- [10] Z. Sun, S. Wang, Q. Li, M. Lyu, T. Butburee, B. Luo, H. Wang, J. M. T. A. Fischer, C. Zhang, Z. Wu, L. Wang, *Adv. Sustainable Syst.* **2017**, *1*, 1700003.
- [11] X. Ma, Q. Chen, C. Han, S. Zhou, Z. Li, J. Liu, F. Hu, J. Wang, N. Wang, Y. Zhu, J. Zhu, *Adv. Funct. Mater.* **2023**, *34*, 2307733.
- [12] D. Chen, Z. Wang, J. Fu, J. Zhang, K. Dai, *Sci. China Mater.* **2024**, *67*, 541-549.
- [13] R. Fang, Z. Yang, Z. C. Kadirova, Z. He, Z. Wang, J. Ran, L. Zhang, *Appl. Surf. Sci.* **2022**, *598*, 153848.
- [14] F. Li, X. Yue, D. Zhang, J. Fan, Q. Xiang, *Appl. Catal. B Environ.* **2021**, *292*, 120179.
- [15] Y. Liu, J. Shang, T. Zhu, *J. Mater. Sci. Technol.* **2024**, *176*, 36-47.
